# Supplementary material for: How ants use quorum sensing to estimate the average quality of a fluctuating resource
Source: PubMed Central journal article supplement (PMC4495386; doi:10.1038/srep11890), 2015-07-08
Supplement: srep11890-s1.pdf [file srep11890-s1.pdf]

1 **How ants use quorum sensing to estimate the average quality of a fluctuating resource.**

2 Nigel R. Franks, Jonathan P. Stuttard, Carolina Doran, Julian C. Esposito, Maximillian C.  
3 Master, Ana B. Sendova-Franks, Naoki Masuda, Nicholas F. Britton

4 **Supplementary Information**

5 **Table S1.** Fixed effects for the log-linear mixed model with a Negative binomial error structure  
6 and a log link applied to the 44 emigrations in which the colonies made a choice with a response  
7 variable Number of ants in new nest. Nest type is Fluctuating or Mediocre. Treatment is the  
8 percentage of time the Fluctuating nest was good vs poor quality: 75% G : 25% P, 50% G :  
9 50% P, 25% G : 75% P.

**Fixed Effects**  
Target:No. in new nest

| Source                       | F       | df1 | df2   | Sig. |
|------------------------------|---------|-----|-------|------|
| Corrected Model ▼            | 38.056  | 11  | 1,152 | .000 |
| Treatment                    | 1.833   | 2   | 1,152 | .160 |
| Nest_type                    | 3.043   | 1   | 1,152 | .081 |
| Time_min                     | 323.020 | 1   | 1,152 | .000 |
| Nest_type*Treatment          | 10.619  | 2   | 1,152 | .000 |
| Time_min*Treatment           | 1.883   | 2   | 1,152 | .153 |
| Time_min*Nest_type           | 0.017   | 1   | 1,152 | .896 |
| Time_min*Nest_type*Treatment | 15.550  | 2   | 1,152 | .000 |

Probability distribution:Negative binomial  
Link function:Log

10

11

12

13

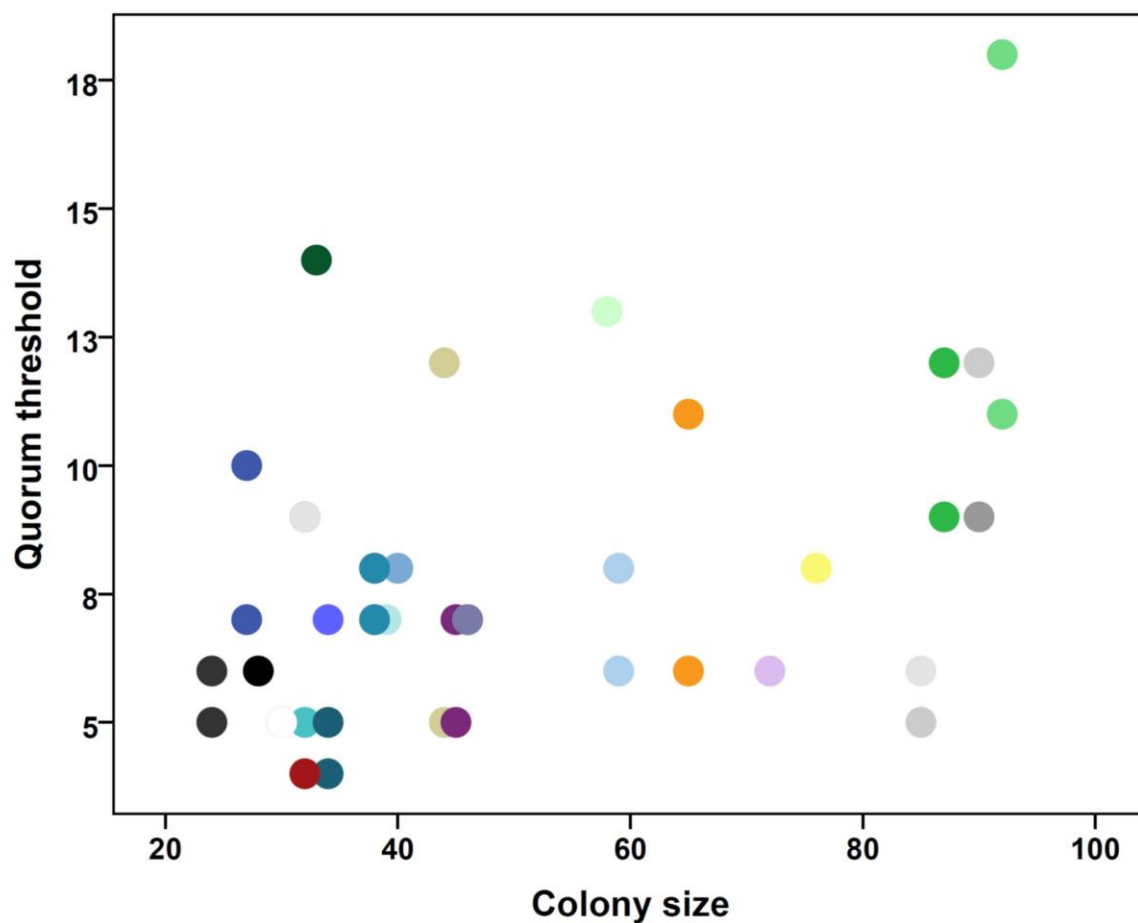

14

15 **Figure S1.** Positive relationship between quorum threshold and colony size for the 44  
 16 emigrations by 27 colonies (out of a total of 30), in which the colony made a nest choice.  
 17 Different colours represent different colonies. Seventeen colonies are represented twice  
 18 because they made a nest choice in both of the treatments they underwent. There are seven  
 19 overlapping values. Hence 37 points are visible in the plot.

20

21

22

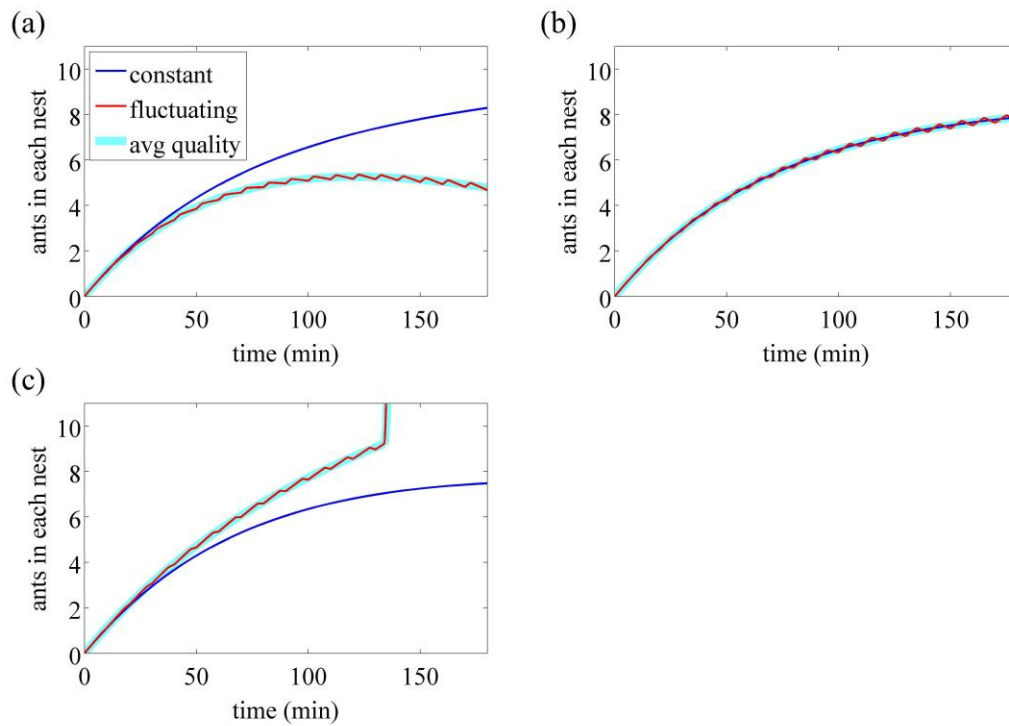

23

24 **Figure S2.** Time courses of the number of ants in each nest when the fluctuation of the FN  
 25 has a larger amplitude than in the case of Fig. 6. (a) 25% G : 75% P, (b) 50% G : 50% P, (c)  
 26 75% G : 25% P. We set  $(k_2, \rho_2) = (0.038, 0.001)$  and  $(k_2, \rho_2) = (0.002, 0.015)$  for the good and  
 27 poor phases of the FN, respectively. In (c), the steep increase represents rapid influx of  
 28 passive workers and brood items that are carried into the nest site after quorum attainment.

29

30

31

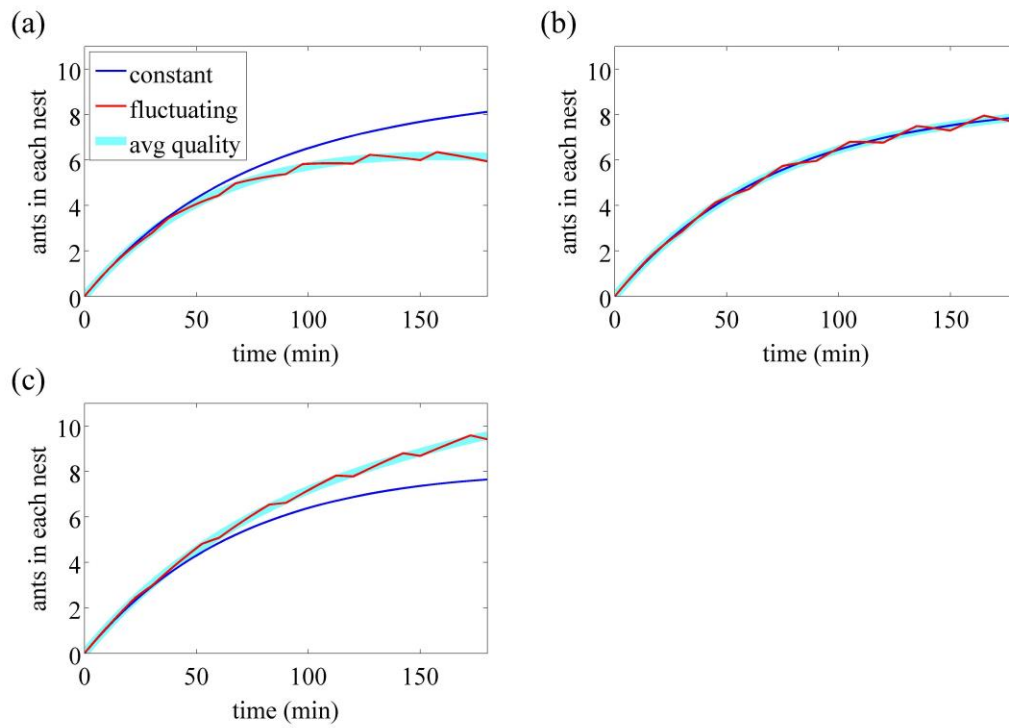

32

33 **Figure S3.** Same as Fig. 6, but with a period of 30 min for the FN. (a) 25% G : 75% P, (b)  
 34 50% G : 50% P, (c) 75% G : 25% P.

35

36

37

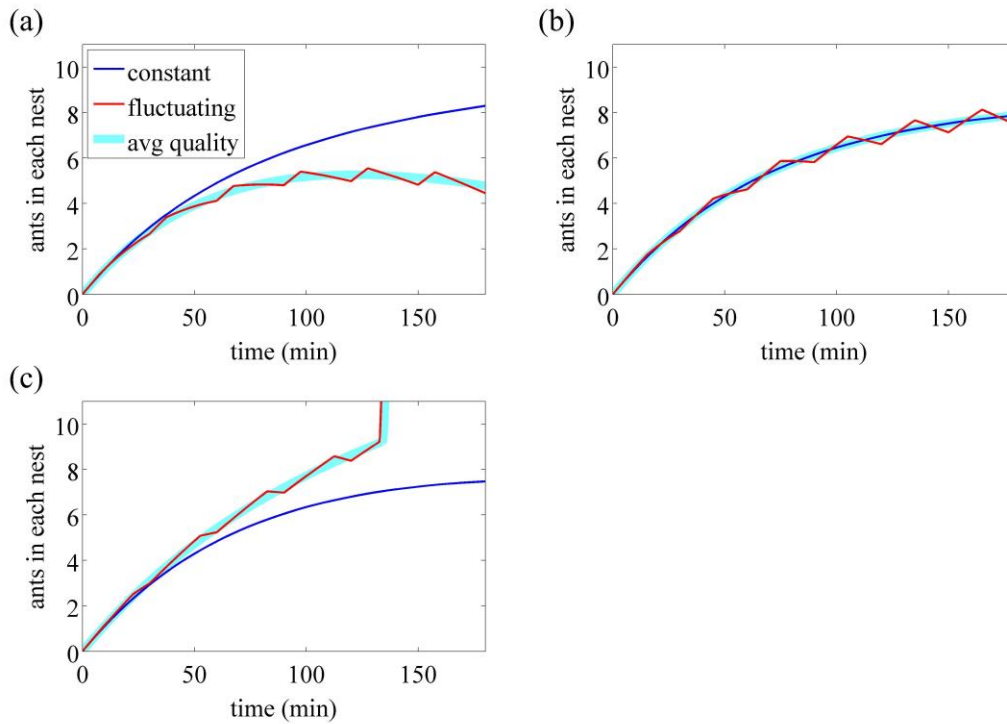

38

39 **Figure S4.** Same as Fig. S2, but with a period of 30 min for the FN. (a) 25% G : 75% P, (b)  
 40 50% G : 50% P, (c) 75% G : 25% P. In (c), the steep increase represents rapid influx of  
 41 passive workers and brood items that are carried into the nest site after quorum attainment.

42
